# Supplementary material for: Amelioration of High Fructose-Induced Cardiac Hypertrophy by Naringin
Source: PubMed Central journal article supplement (PMC6013481; doi:10.1038/s41598-018-27788-1), 2018-06-21
Supplement: 41598_2018_27788_MOESM1_ESM.pdf [file 41598_2018_27788_MOESM1_ESM.pdf]

## Amelioration of High Fructose-Induced Cardiac Hypertrophy by Naringin

Jung Hyun Park<sup>a</sup>, Hyeong Jun Ku<sup>b</sup>, Jae Kyeom Kim<sup>c</sup>, Jeon-Woo Park<sup>b,\*</sup>, Jin Hyup Lee<sup>a,\*</sup>

*<sup>a</sup>Department of Food and Biotechnology, Korea University, Sejong, Korea, <sup>b</sup>School of Life Sciences and Biotechnology, BK21 Plus KNU Creative BioResearch Group, College of Natural Sciences, Kyungpook National University, Taegu, Korea, <sup>c</sup>School of Human Environmental Sciences, University of Arkansas, Fayetteville, Arkansas, USA*

Running Title: Naringin protects fructose-induced cardiac hypertrophy

\*Correspondence should be addressed to Jin Hyup Lee; [jinyuplee@korea.ac.kr](mailto:jinyuplee@korea.ac.kr) and Jeon-Woo Park; [parkjw@knu.ac.kr](mailto:parkjw@knu.ac.kr)

# Supplementary Figures

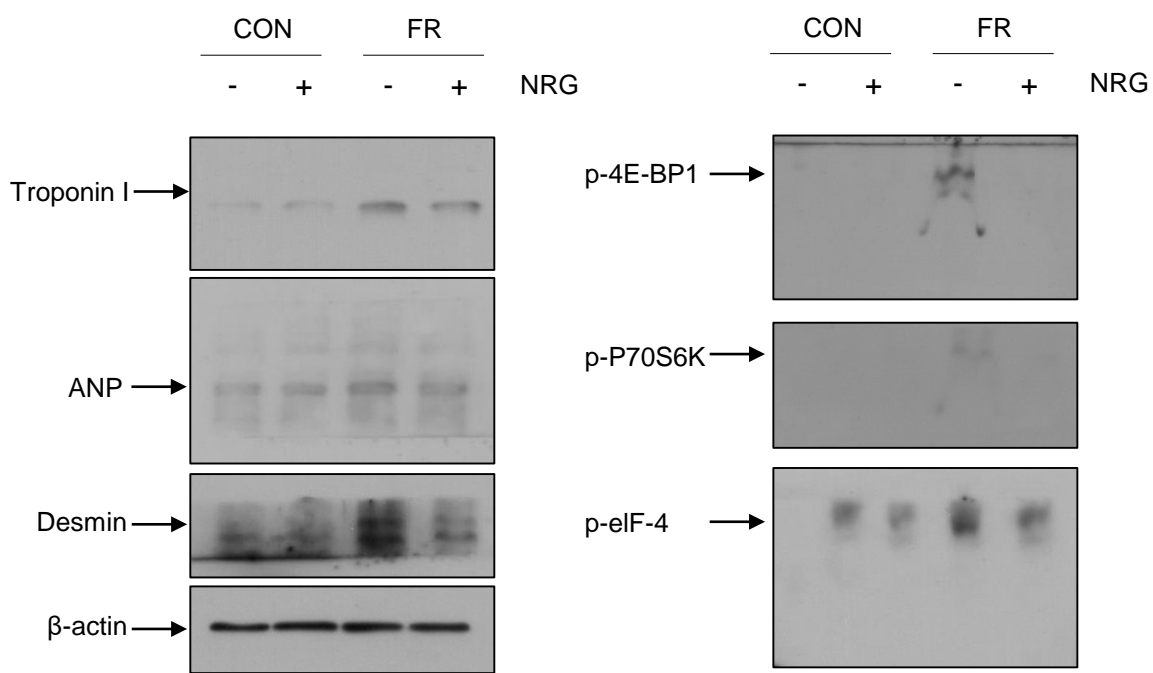

**Supplementary Figure S1.** The original bands for Figure 1d and f in the main manuscript.

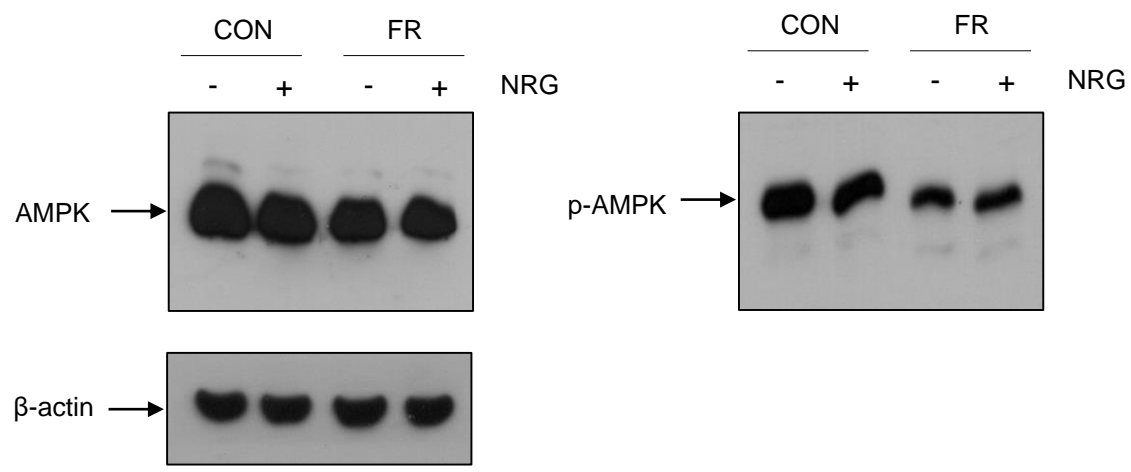

**Supplementary Figure S2.** The original bands for Figure 2a in the main manuscript.

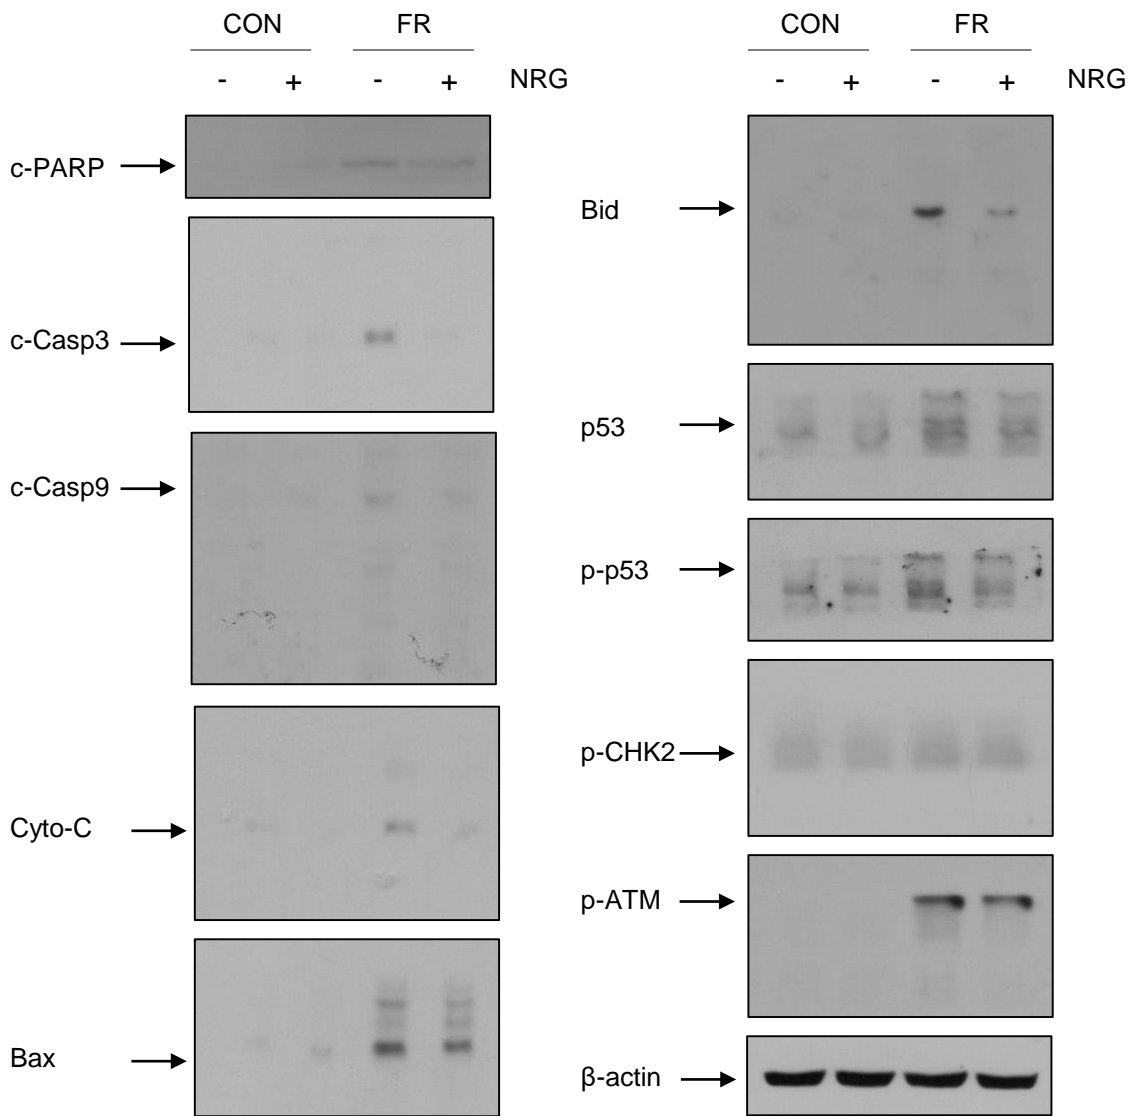

**Supplementary Figure S3. The original bands for Figure 3e and f in the main manuscript.**

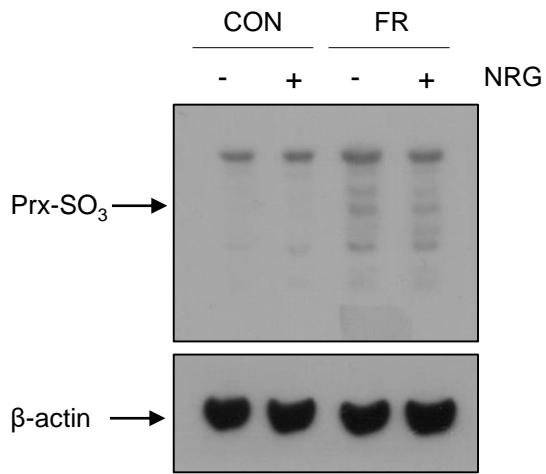

**Supplementary Figure S4.** The original bands for Figure 4c in the main manuscript.

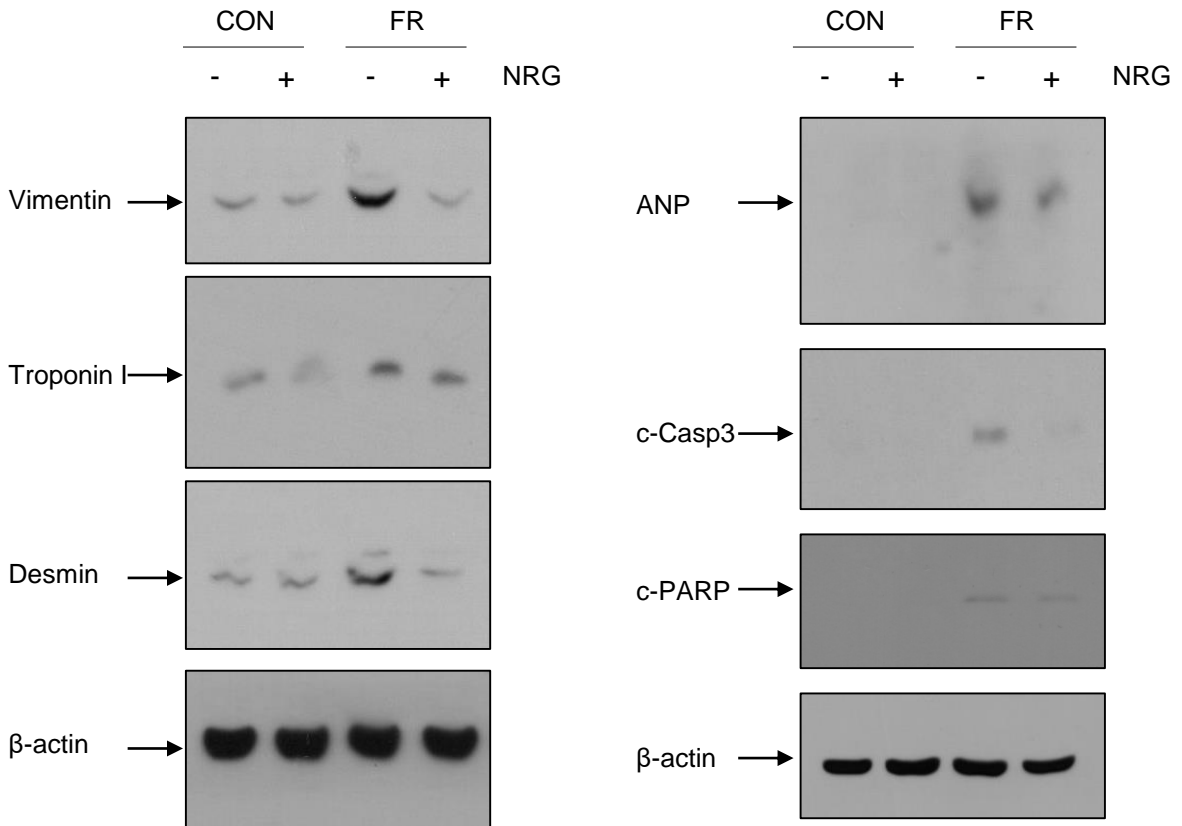

**Supplementary Figure S5.** The original bands for Figure 5f and g in the main manuscript.
